# Supplementary material for: Super-Toughed PLA Blown Film with Enhanced Gas Barrier Property Available for Packaging and Agricultural Applications
Source: MDPI journal article supplement (doi:10.3390/ma12101663), 2019-05-22
Supplement: s1 [file s1]

# Supplementary Materials: Super-Toughed PLA Blown Film with Enhanced Gas Barrier Property Available for Packaging and Agricultural Applications

Yuanping Jiang, Cong Yan, Kai Wang, Dawei Shi, Zhengying Liu and Mingbo Yang

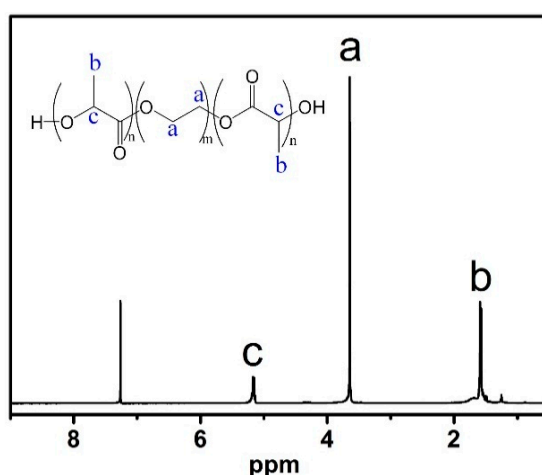

**Figure S1.**  $^1\text{H}$  NMR spectrum of lab-made DPD (400 MHz, Chloroform-d).

The  $M_n$  of PEG segment applied was 4000 g/mol, and the PLLA segment was calculated to be 4135 g/mol with NMR results (AV III HD 400 MHz, Bruker Company, Leipzig, Switzerland).

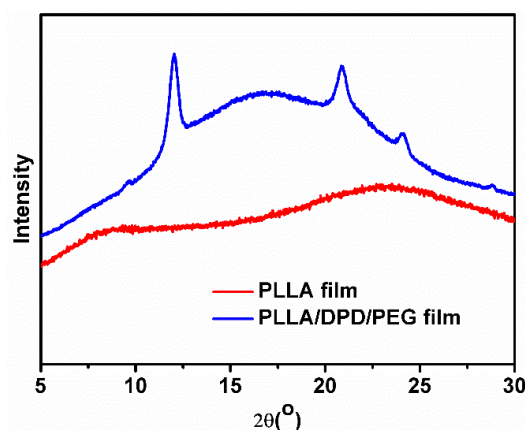

**Figure S2.** The XRD spectra of PLLA and PLLA/DPD/PEG-10 films.

XRD (ultima-IV, Rigaku, Tokyo, Japan) profiles was also added to illustrate SC in blown films. The PLLA film had no characteristic diffraction peaks because of its amorphous structure. However, the PLLA/DPD/PEG film showed obvious SC crystals' characteristic diffraction peaks ( $2\theta = 12^\circ, 21^\circ, 24^\circ$ ).

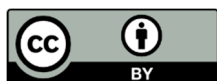

© 2019 by the authors. Submitted for possible open access publication under the terms and conditions of the Creative Commons Attribution (CC BY) license (<http://creativecommons.org/licenses/by/4.0/>).
